# Supplementary material
Source: PubMed Central journal article supplement (PMC2668662)
Supplement: NIHMS82548-supplement-01.pdf [file NIHMS82548-supplement-01.pdf]

**Supplemental Table 1. Cell surface markers of HSCs and multipotent progenitors\***

| Marker | Reason for inclusion in the study                         | References |
|--------|-----------------------------------------------------------|------------|
| CD4    | Expressed on fetal and postnatal HSCs                     | (1, 2)     |
| CD13   | Expressed on fetal but not adult HSCs                     | (3)        |
| CD31   | Expressed on mouse placental HSCs                         | (4)        |
| CD33   | Expressed on fetal but not adult HSCs                     | (3)        |
| CD34   | Highly expressed on HSCs throughout ontogeny              | (5, 6)     |
| CD38   | Expressed on progenitors but not HSCs throughout ontogeny | (3)        |
| CD41   | Expressed on mouse placental HSCs                         | (4)        |
| CD90   | Expressed on fetal and postnatal HSCs                     | (3)        |
| CD95   | Expressed on fetal and postnatal HSCs                     | (7)        |
| CD117  | Expressed on fetal and postnatal HSCs                     | (8) (9)    |
| CD133  | Expressed on fetal and postnatal HSCs                     | (10)       |
| HLA-DR | Expressed on fetal but not adult HSCs                     | (3, 11)    |

\*Human, unless otherwise specified.

## REFERENCES

1. Muench, M O, Roncarolo, M-G, Rosnet, O, Birnbaum, D, Namikawa, R (1997) *Exp Hematol* **25**:277-287.
2. Zauli, G *et al.* (1994) *Blood* **84**:1896-1905.
3. Muench, M O, Cupp, J, Polakoff, J, Roncarolo, M G (1994) *Blood* **83**:3170-81.
4. Ottersbach, K, Dzierzak, E (2005) *Dev Cell* **8**:377-87.
5. Civin, C I *et al.* (1984) *The Journal of Immunology* **133**:157-165.
6. Di Giusto, D *et al.* (1994) *Blood* **84**:421-432.
7. Bárcena, A, Muench, M O, Song, K S, Ohkubo, T, Harrison, M R (1999) *Exp Hematol* **27**:1428-1439.
8. Papayannopoulou, T, Bricce, M., Broudy, V C, Zsebo, K M (1991) *Blood* **78**:1403.
9. Terstappen, L W M M, Huang, S, Safford, M, Lansdorp, P M, Loken, M R (1991) *Blood* **77**:1218-1227.
10. Yin, A H *et al.* (1997) *Blood* **90**:5002-12.
11. Srour, E F *et al.* (1991) *Blood Cells* **17**:287-95.
