# Supplementary material
Source: PubMed Central journal article supplement (PMC2668662)
Supplement: NIHMS82548-supplement-02.pdf [file NIHMS82548-supplement-02.pdf]

**Supplemental Table 2. Monoclonal antibodies used in this study**

| Specificity | Form          | Isotype | Clone    | Manufacturer                     | Use                  |
|-------------|---------------|---------|----------|----------------------------------|----------------------|
| CD3         | FITC, PE      | IgG1    | SK7      | BD Biosciences                   | FC <sup>a</sup>      |
| CD4         | PE            | IgG1    | SK3      | BD Biosciences                   | FC                   |
| CD10        | FITC, PE, APC | IgG1    | HI10a    | BD Biosciences                   | FC                   |
| CD13        | PE, APC       | IgG1    | L138     | BD Biosciences                   | FC                   |
| CD14        | FITC          | IgG1    | MΦΠ9     | BD Biosciences                   | FC                   |
| CD15        | PE, APC       | IgM     | HI98     | BD Biosciences                   | FC                   |
| CD19        | FITC, PE, APC | IgG1    | SJ25-C1  | Invitrogen/Caltag                | FC                   |
| CD20        | FITC, PE      | IgG3    | HI47     | Invitrogen/Caltag                | FC                   |
| CD31        | PE            | IgG1    | WM-59    | BD Biosciences                   | FC                   |
| CD33        | PE            | IgG1    | P67.6    | BD Biosciences                   | FC                   |
| CD34        | PE            | IgG1    | 8G12     | Invitrogen/Caltag                | FC                   |
| CD34        | APC           | IgG1    | 581      | Beckman Coulter                  | FC + CS <sup>b</sup> |
| CD38        | PE            | IgG1    | HIT2     | BD Biosciences                   | FC                   |
| CD41        | PE            | IgG1    | HIP8     | BD Biosciences                   | FC                   |
| CD45        | FITC, PE, APC | IgG1    | HI30     | Invitrogen/Caltag                | FC + CS              |
| CD56        | FITC          | IgG2b   | C5.9     | Exalpha, Inc., Boston, MA        | FC                   |
| CD71        | PE            | IgG1    | T56/14   | Invitrogen/Caltag                | FC                   |
| CD86        | PE            | IgG1    | 24F      | BD Biosciences                   | FC                   |
| CD117       | PE            | IgG1    | YB5.B8   | BD Biosciences                   | FC                   |
| CD133       | PE, APC       | IgG1    | AC133    | Milteny Biotec, Inc., Auburn, CA | FC                   |
| CD235a      | FITC, PE      | IgG1    | 11E4B7.6 | Beckman Coulter                  | FC                   |
| Epo-R       | FITC, PE      | IgG2b   | 38409    | R&D Systems, Inc.                | FC                   |
| VEGF-R2     | PE            | IgG1    | 89106    | R&D Systems, Inc.                | FC                   |
| Tie-2       | PE, APC       | IgG1    | 83715    | R&D Systems, Inc.                | FC                   |
| HLA-DR      | PE            | IgG1    | L243     | BD Biosciences                   | FC                   |
| IgM         | FITC          | IgG1    | G-20-127 | BD Biosciences                   | FC                   |

<sup>a</sup>FC: Flow cytometry. <sup>b</sup>CS: cell sorting.
