# Supplementary material
Source: PubMed Central journal article supplement (PMC2668662)
Supplement: NIHMS82548-supplement-03.pdf [file NIHMS82548-supplement-03.pdf]

**Supplemental Table 3. Concentrations of human recombinant growth factor used in this study**

| Growth factor                                             | Concentration |
|-----------------------------------------------------------|---------------|
| Erythropoietin (Epo)                                      | 10 U/ml       |
| Flt-3/Flk-2 ligand (FL)                                   | 100 ng/ml     |
| Granulocyte colony-stimulating factor (G-CSF)             | 20 ng/ml      |
| Granulocyte-macrophage colony-stimulating factor (GM-CSF) | 20 ng/ml      |
| Interleukin (IL)-3                                        | 20 ng/ml      |
| IL-6                                                      | 20 ng/ml      |
| IL-7                                                      | 20 ng/ml      |
| IL-15                                                     | 20 ng/ml      |
| Stem cell factor (SCF)                                    | 50 ng/ml      |
| Thrombopoietin (TPO)                                      | 20 ng/ml      |
